# Supplementary material for: Linkage analysis identifies an isolated strabismus locus at 14q12 overlapping with FOXG1 syndrome region
Source: HighWire-hosted journal article supplement (doi:10.1136/jmedgenet-2020-107226), 2020-11-30
Supplement: jmedgenet-2020-107226supp001_data_supplement.pdf [file jmedgenet-2020-107226supp001_data_supplement.pdf]

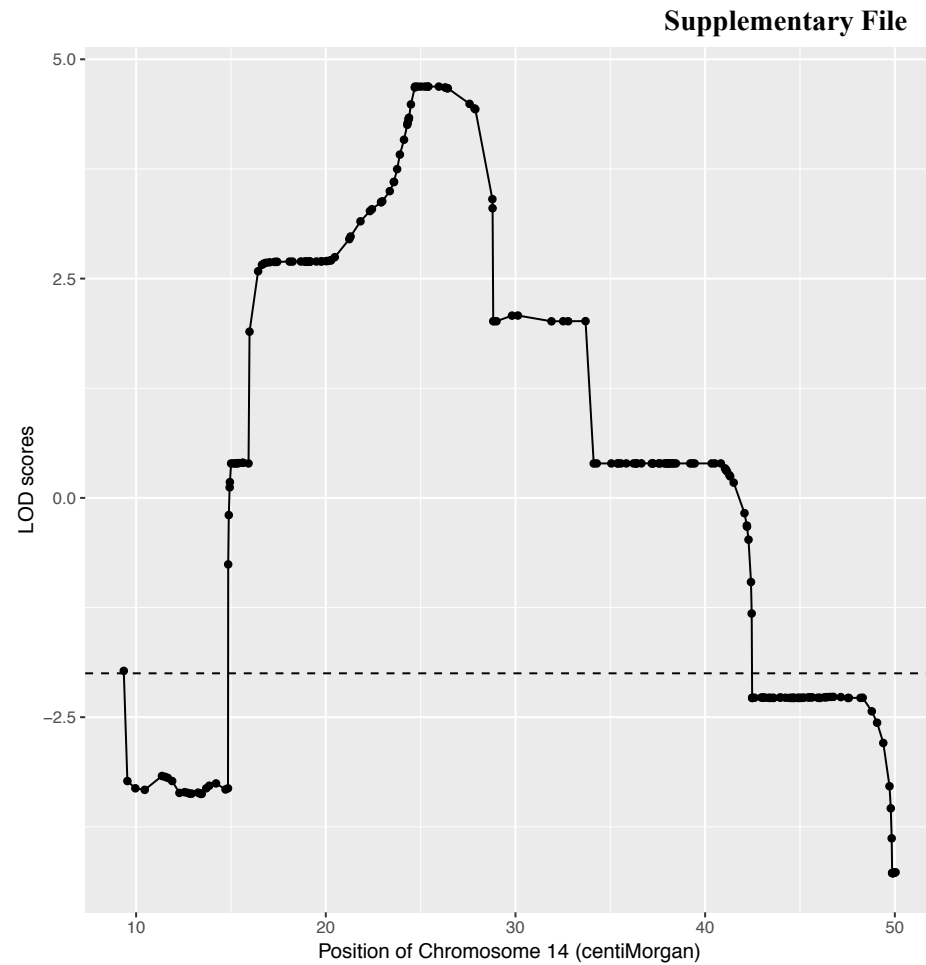

**Supplementary Figure 1.** LOD score plot for the observed linked region on chromosome 14. The horizontal axis represents the location in terms of centiMorgans. The displayed region spans the physical positions of chr14:28,467,136 – 30,045,978 (hg19/GRCh37). The vertical axis represents LOD score. The dash line indicates the threshold of LOD <-2.

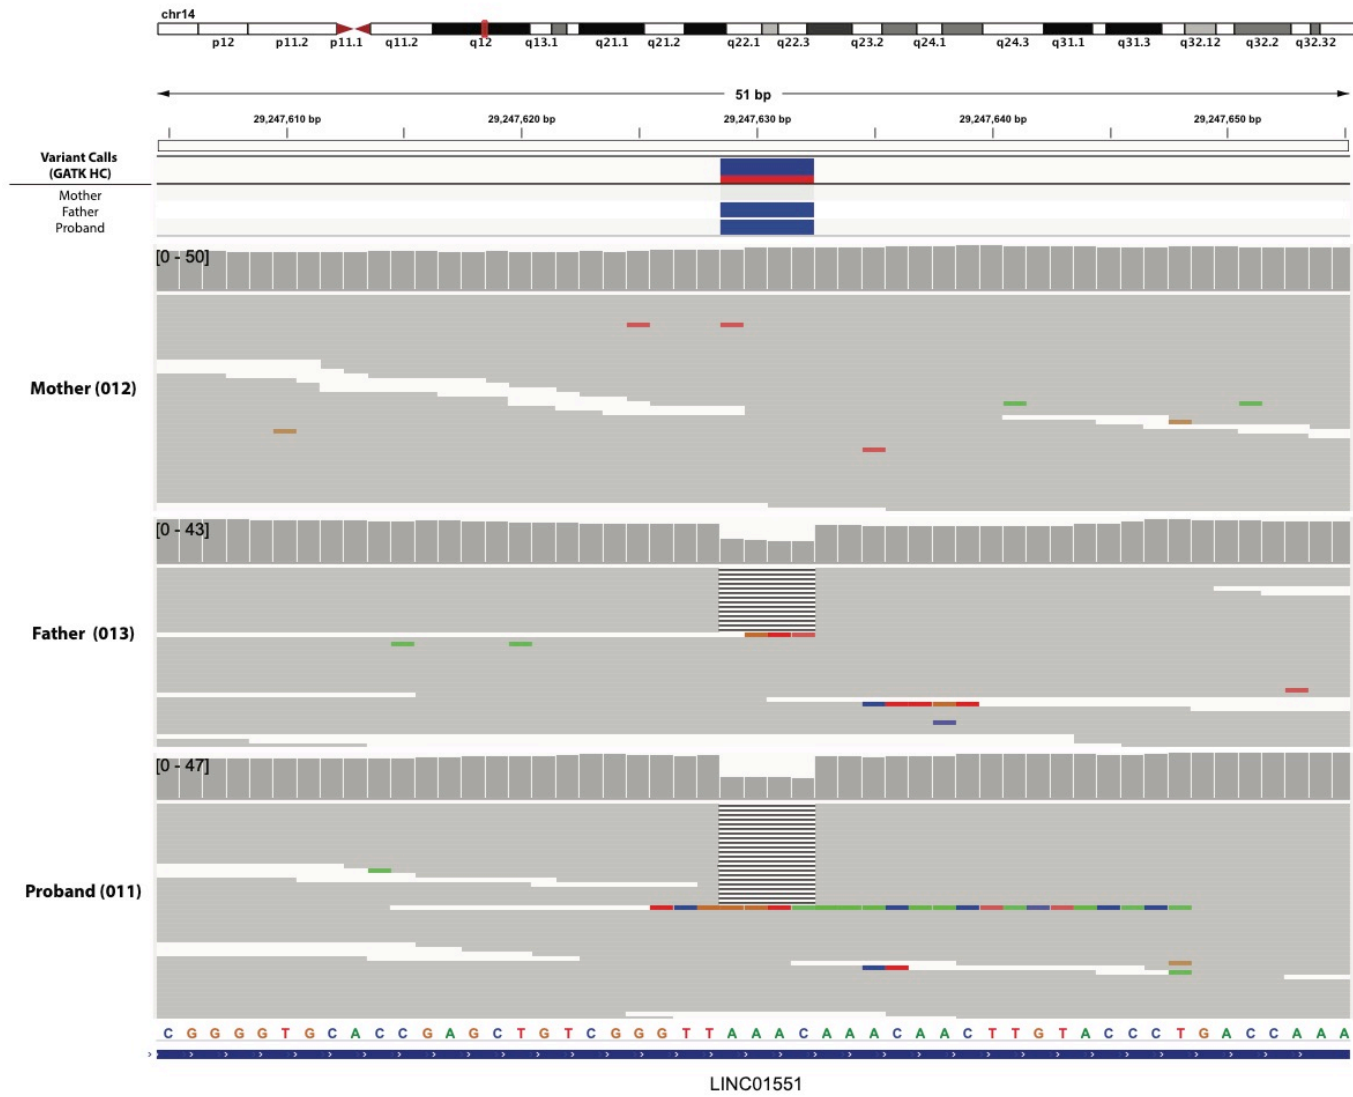

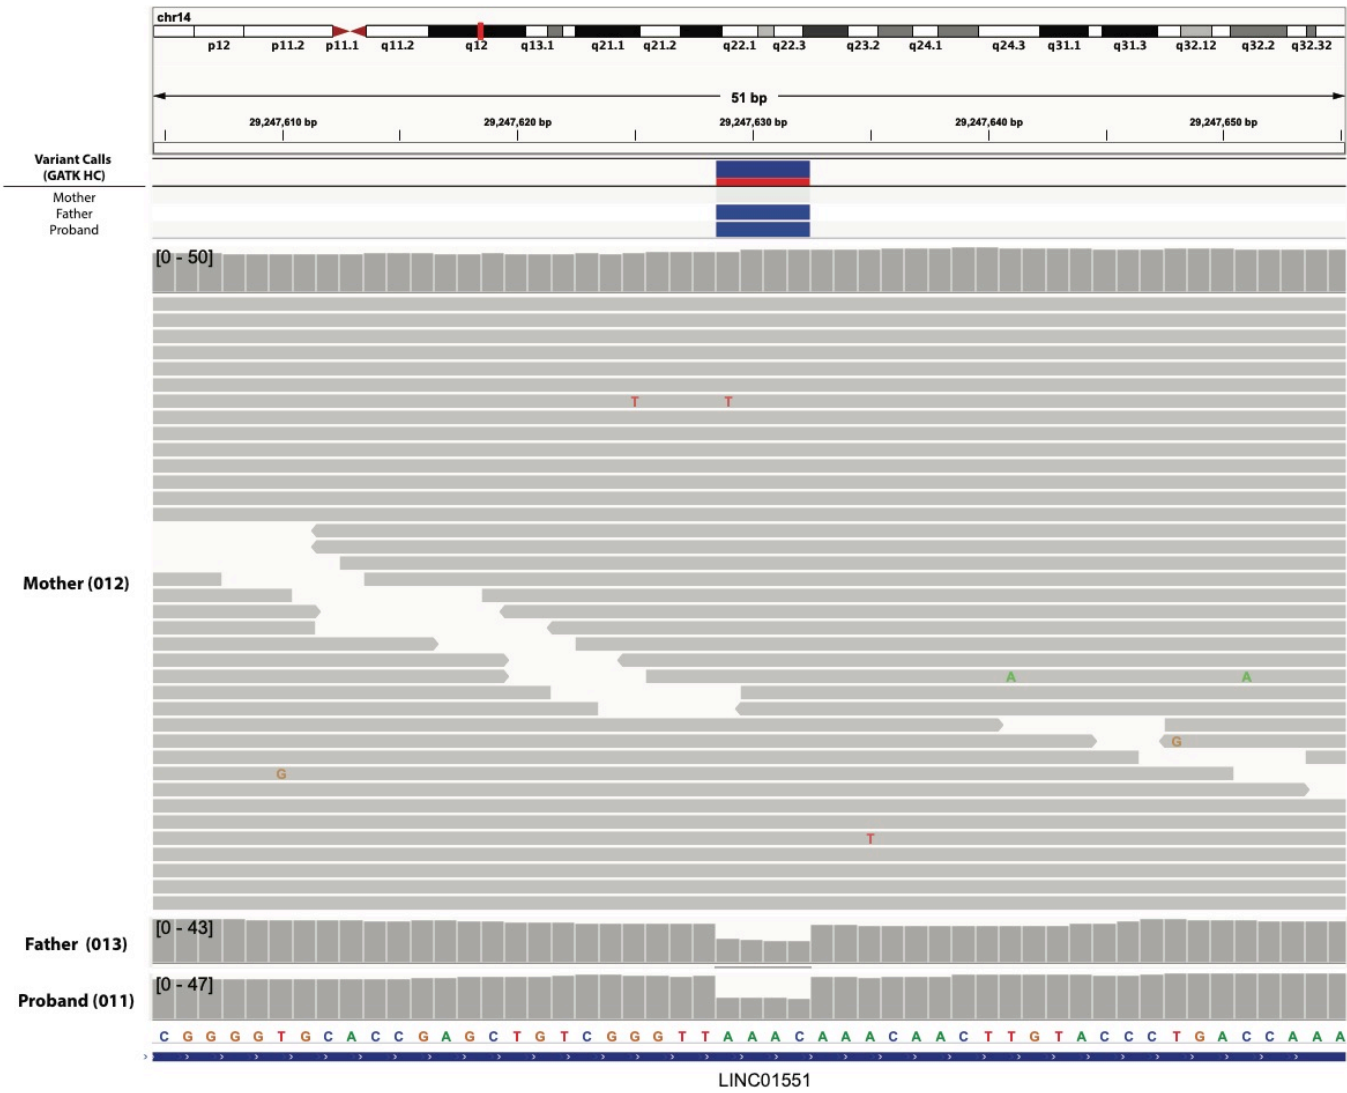

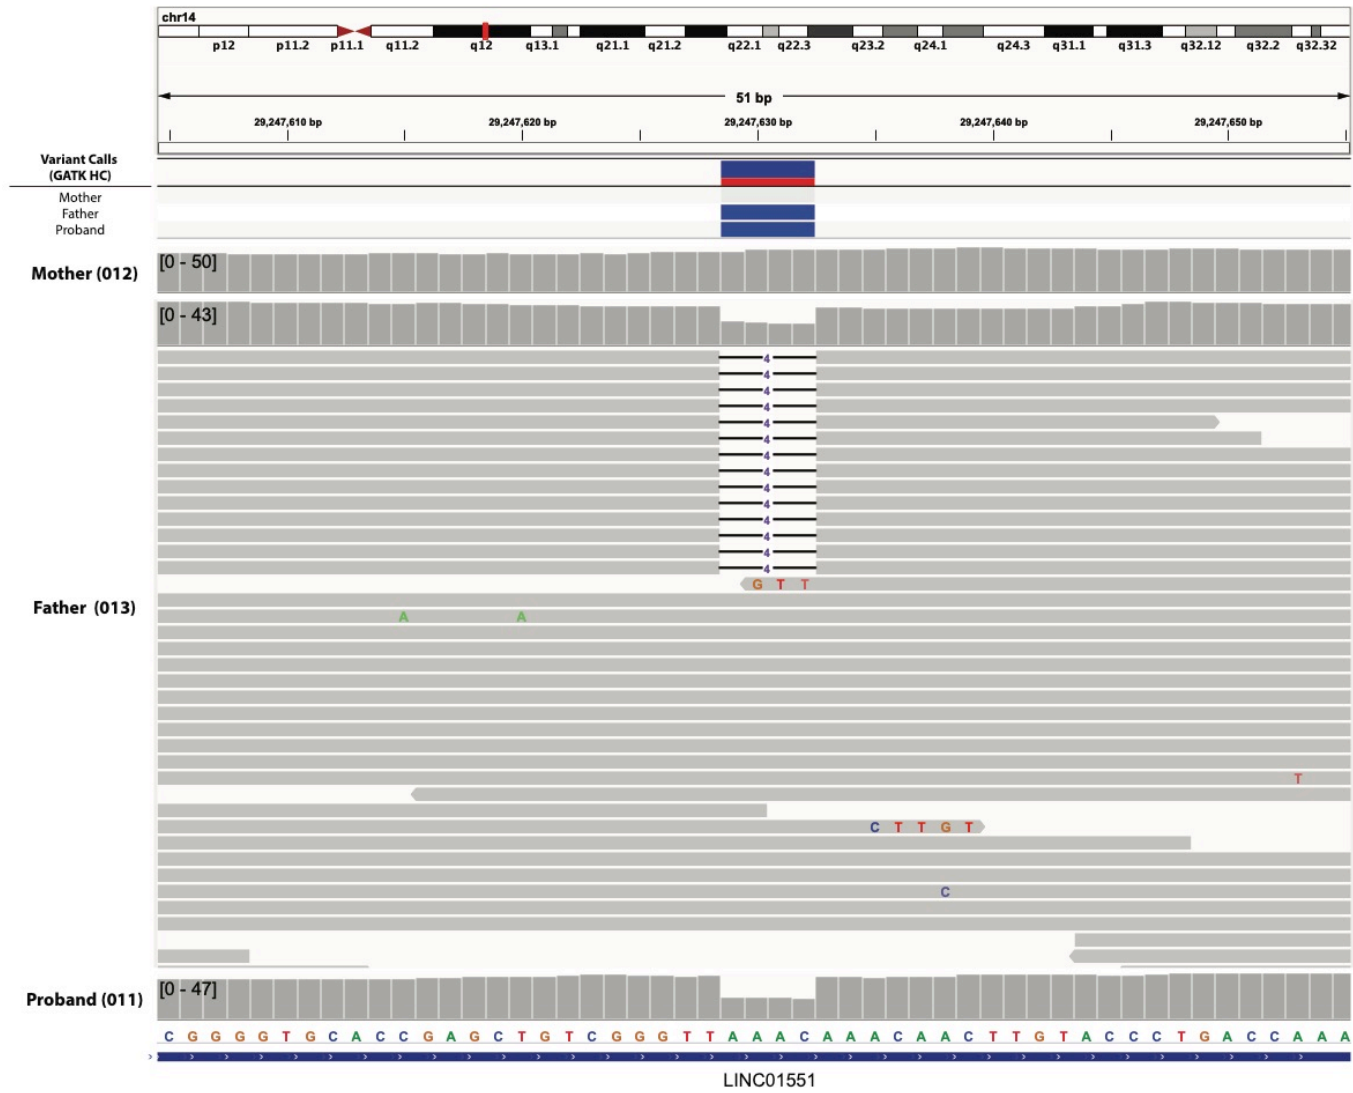

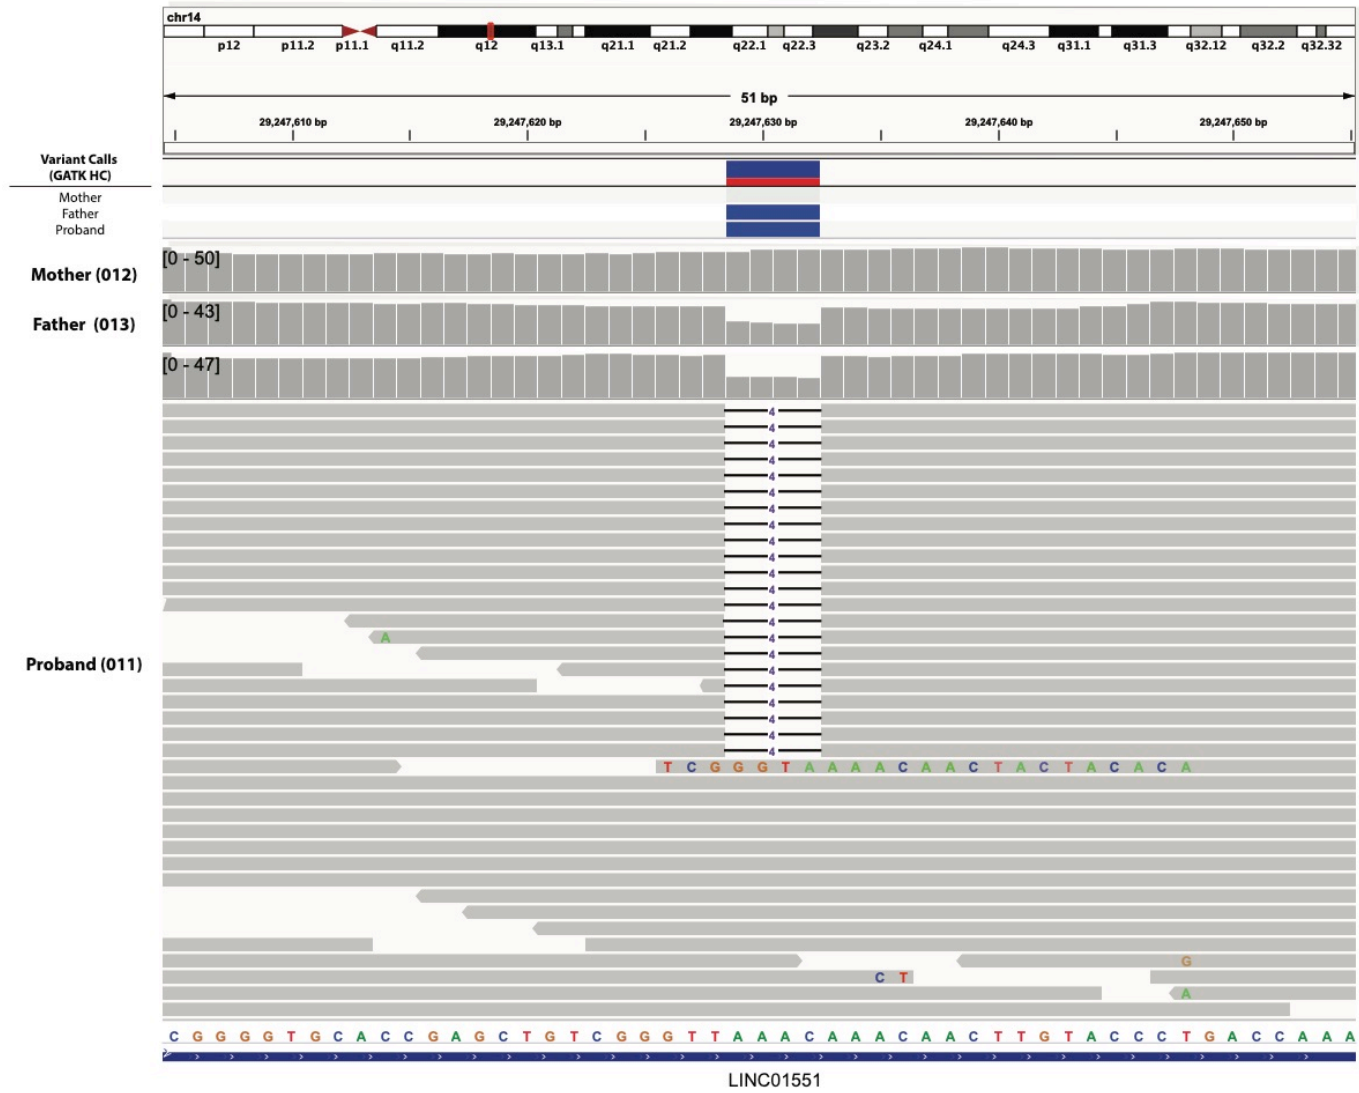

**Supplementary Figure 2.**

a) Integrative Genomic Viewer (IGV) screenshot of the WGS for the parent-child trio. (Affected: 011 and 013; Unaffected: 012). The horizontal axis represents the sequence of the reference genome. A small portion of the aligned reads for each of the three individuals is shown as indicated by the labels along the vertical axis.

- b) Extended view of IGV screenshot for 012 (Mother).
- c) Extended view of IGV screenshot for 013 (Father).
- d) Extended view of IGV screenshot for 011 (Proband).

(Detailed information about the IGV display can be obtained on <https://software.broadinstitute.org/software/igv/>)
